# Supplementary material
Source: PubMed Central journal article supplement (PMC2575316)
Supplement: 0806375105_0806375105SI.pdf [file 0806375105_0806375105SI.pdf]

# Supporting Information

Bogani and Boehmer 10.1073/pnas.0806375105

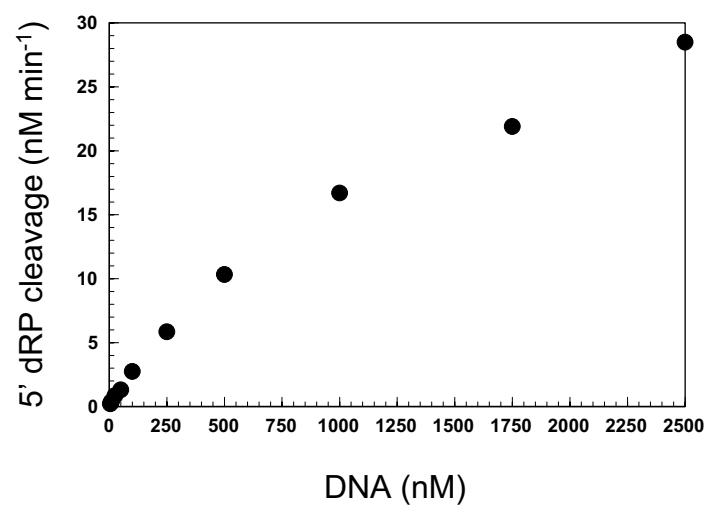

Fig. S1. Initial rates of 5' dRP cleavage.

**Table S1. Oligonucleotides**

| Name  | Length | Sequence (5'–3')                |
|-------|--------|---------------------------------|
| PBAZ3 | 31-mer | GCACCGGATCCGCAGGGCGCATCAGCTGCAG |
| PBAZ4 | 16-mer | CTGCAGCTGATGCGCC                |
| PBAZ5 | 16-mer | pUCTGCGGATCCGGTGC               |
| PBAZ6 | 15-mer | pUTGCGGATCCGGTGC                |
| PBAZ7 | 31-mer | CTGCAGCTGATGCGCCUTGCGGATCCGGTGC |

In sequences p indicates 5' phosphate.
